# Supplementary material
Source: publisher figshare collection journal article supplement (https://gsajournals.figshare.com/ndownloader/files/20026298)
Supplement: Supplementary file 1 [file 20026298]

## Sheet: Table S1
Identifier	TMP	PGRC number	Species	Country of origin	IPK number	PI number	UE number	Ames number
CAM176		CN 114242	C. alyssum		CAM176
CN114243		CN 114243	C. alyssum	Germany		PI650132
PI650133		CN 114241	C. hispida subsp. gradiflora	Turkey		PI650133
laxa			C. laxa
TMP24026	TMP24026		C. microcarpa "Type 1"	Georgia	CAM185
TMP26168	TMP26168		C. microcarpa "Type 1"					Ames31120
TMP26169	TMP26169		C. microcarpa "Type 1"					Ames31121
TMP26170	TMP26170		C. microcarpa "Type 1"					Ames31122
TMP26171	TMP26171		C. microcarpa "Type 1"					Ames31123
TMP26172	TMP26172		C. microcarpa "Type 1"					Ames31124
TMP26173	TMP26173		C. microcarpa "Type 1"					Ames31125
CN115105		CN 115105	C. microcarpa "Type 2"	Canada	CAM10-01
CN115246		CN 115246	C. microcarpa "Type 2"	Germany		PI650136
CN115248		CN 115248	C. microcarpa "Type 2"	Unknown	CAM60
CN115249		CN 115249	C. microcarpa "Type 2"	Hungary		PI633186
CN115250		CN 115250	C. microcarpa "Type 2"	Poland		PI633187
CN119102		CN 119102	C. microcarpa "Type 2"	Germany	CAM47
CN119103		CN 119103	C. microcarpa "Type 2"	Germany	CAM 50
PI633188	TMP26166		C. microcarpa "Type 2"	Poland		PI633188
PI633189	TMP26167		C. microcarpa "Type 2"			PI633189
TMP19735	TMP19735		C. microcarpa "Type 2"
TMP19799	TMP19799		C. microcarpa "Type 2"
TMP23968	TMP23968		C. microcarpa "Type 2"
TMP23972	TMP23972		C. microcarpa "Type 2"
TMP23977	TMP23977	CN 120253	C. microcarpa "Type 2"
TMP23981	TMP23981	CN 120043	C. microcarpa "Type 2"
TMP23983	TMP23983		C. microcarpa "Type 2"
TMP23999	TMP23999	CN 120025	C. microcarpa "Type 2"
TMP24000	TMP24000	CN 120026	C. microcarpa "Type 2"
CN119243		CN 119243	C. microcarpa 4X
TMP24028	TMP24028		C. neglecta	France		PI650135
CN115247		CN 115247	C. rumelica	Ukraine			IU056505
TMP24027	TMP24027		C. rumelica	Spain		PI650134
051-14			C. sativa
11CS0262			C. sativa
17Cs1132			C. sativa
17Cs1133			C. sativa
17Cs1134			C. sativa
BlaineCreek			C. sativa	Montana State University, USA
Calena			C. sativa	Germany
CAM105			C. sativa		CAM105
CAM106			C. sativa		CAM106
CAM111		CN 113716	C. sativa	Former Soviet Union	CAM111
CAM112		CN 113717	C. sativa	Germany	CAM112
CAM120		CN 113721	C. sativa	Poland	CAM120
CAM124		CN 113723	C. sativa	Germany	CAM124
CAM131		CN 113724	C. sativa	Germany	CAM131
CAM135			C. sativa		CAM135
CAM136		CN 113726	C. sativa	Poland	CAM136
CAM138			C. sativa		CAM138
CAM139			C. sativa		CAM139
CAM140			C. sativa		CAM140
CAM141			C. sativa		CAM141
CAM142			C. sativa		CAM142
CAM143			C. sativa		CAM143
CAM144			C. sativa		CAM144
CAM145			C. sativa		CAM145
CAM149		CN 113731	C. sativa	Germany	CAM149
CAM154		CN 113736	C. sativa	Germany	CAM154
CAM160		CN 113742	C. sativa	Germany	CAM160
CAM164		CN 113746	C. sativa	Germany	CAM164
CAM168			C. sativa		CAM168
CAM170		CN 113750	C. sativa	Poland	CAM170
CAM175		CN 113754	C. sativa	Sweden	CAM175
CAM189			C. sativa		CAM189
CAM190			C. sativa		CAM190
CAM192			C. sativa	Germany	CAM192
CAM194			C. sativa		CAM194
CAM195			C. sativa		CAM195
CAM196			C. sativa		CAM196
CAM197			C. sativa		CAM197
CAM198			C. sativa		CAM198
CAM199			C. sativa		CAM199
CAM200			C. sativa		CAM200
CAM201			C. sativa	Germany	CAM201
CAM202			C. sativa		CAM202
CAM203			C. sativa		CAM203
CAM204			C. sativa		CAM204
CAM205			C. sativa		CAM205
CAM206			C. sativa		CAM206
CAM207			C. sativa		CAM207
CAM208			C. sativa		CAM208
CAM209			C. sativa		CAM209
CAM210			C. sativa		CAM210
CAM211			C. sativa		CAM211
CAM212			C. sativa		CAM212
CAM214			C. sativa		CAM214
CAM216			C. sativa		CAM216
CAM218			C. sativa		CAM218
CAM219		CN 114255	C. sativa	Former Soviet Union	CAM219
CAM22		CN 113683	C. sativa	Unknown	CAM22
CAM223		CN 114256	C. sativa	Unknown	CAM223
CAM224		CN 114257	C. sativa	Unknown	CAM224
CAM229		CN 114259	C. sativa	Poland	CAM229
CAM234			C. sativa		CAM234
CAM235			C. sativa		CAM235
CAM236			C. sativa		CAM236
CAM239			C. sativa		CAM239
CAM240			C. sativa		CAM240
CAM241			C. sativa	Germany	CAM241
CAM245			C. sativa		CAM245
CAM246			C. sativa		CAM246
CAM247			C. sativa		CAM247
CAM248			C. sativa		CAM248
CAM249			C. sativa		CAM249
CAM250			C. sativa		CAM250
CAM252			C. sativa		CAM252
CAM256			C. sativa		CAM256
CAM257			C. sativa		CAM257
CAM258			C. sativa		CAM258
CAM259		CN 114262	C. sativa	Bulgaria	CAM259
CAM260		CN 114263	C. sativa	Bulgaria	CAM260
CAM262		CN 114265	C. sativa	Romania	CAM262
CAM264		CN 113757	C. sativa	Bulgaria	CAM264
CAM27		CN 113660	C. sativa	Poland	CAM27	PI650155
CAM270		CN 113760	C. sativa	Switzerland	CAM270
CAM271			C. sativa		CAM271
CAM272		CN 114270	C. sativa	Belgium	CAM272
CAM275		CN 114273	C. sativa	Great Britain	CAM275
CAM276		CN 114274	C. sativa	Bulgaria	CAM276
CAM278			C. sativa		CAM278
CAM279			C. sativa		CAM279
CAM3		CN 113682	C. sativa	Unknown	CAM3
CAM30		CN 113662	C. sativa	Former Soviet Union	CAM30	PI650157
CAM32		CN 113685	C. sativa	Former Soviet Union	CAM32
CAM38		CN 113669	C. sativa	Austria	CAM38	PI650164
CAM44			C. sativa		CAM44
CAM58			C. sativa	Germany	CAM58
CAM59			C. sativa		CAM59
CAM62		CN 101985	C. sativa	Unknown	CAM62
CAM65		CN 101986	C. sativa	Germany	CAM65
CAM68		CN 113656	C. sativa	Sweden	CAM68	PI650151
CAM70			C. sativa		CAM70
CAM72			C. sativa		CAM72
CAM73			C. sativa		CAM73
CAM77		CN 113691	C. sativa	Former Soviet Union	CAM77
CAM80		CN 113694	C. sativa	Germany	CAM80
CAM81		CN 113695	C. sativa	Germany	CAM81
CAM84		CN 113698	C. sativa	Germany	CAM84
CAM85		CN 113699	C. sativa	Germany	CAM85
CAM88		CN 113702	C. sativa	Germany	CAM88
CAM90		CN 113704	C. sativa	Germany	CAM90
CAM92		CN 113706	C. sativa	Germany	CAM92
CN101990		CN 101990	C. sativa	United Kingdom
CN111331		CN 111331	C. sativa	Ukraine
CN113672		CN 113672	C. sativa	Krasnodar area, former Soviet Union		PI258366
CN30475		CN 30475	C. sativa	Voronezh Region, Russian Federation
CN30478		CN 30478	C. sativa	Russian Federation
Creston			C. sativa
Glacier			C. sativa	Montana State University, USA
Hoga			C. sativa	Denmark
Jasper			C. sativa	Montana State University, USA
Joelle			C. sativa	North Dakota State University, USA
Midas			C. sativa	Canada
Omega			C. sativa
Orovata			C. sativa	Montana State University, USA
Robinson			C. sativa	North Dakota State University, USA
Suneson			C. sativa	Montana State University, USA
TMP23962	TMP23962	CN 119294	C. sativa	Rivens'ka oblast, Ukraine			IU600001
TMP23963	TMP23963	CN 119295	C. sativa	Rivens'ka oblast, Ukraine			IU600002
TMP23964	TMP23964	CN 119296	C. sativa	Russian Federation			IU600003
TMP23965	TMP23965	CN 119297	C. sativa	Kyrgyzstan			IU600004
TMP23966	TMP23966	CN 119298	C. sativa	Krasnoyarskii krai, Russian Federation			IU600005
TMP23967	TMP23967	CN 119299	C. sativa	Russian Federation			IU600006
TMP23969	TMP23969	CN 119300	C. sativa	Ivano-Frankivs'ka oblast, Ukraine			IU600008
TMP23970	TMP23970	CN 120001	C. sativa	Ternopil's'ka oblast, Ukraine			IU600009
TMP23971	TMP23971	CN 120002	C. sativa	Volins'ka oblast, Ukraine			IU600010
TMP23973	TMP23973	CN 120003	C. sativa	Czech Republic			IU600012
TMP23974	TMP23974	CN 120004	C. sativa	Omskaya oblast, Russian Federation			IU600013
TMP23975	TMP23975	CN 120005	C. sativa	Volgogradskaya oblast, Russian Federation			IU600014
TMP23976	TMP23976	CN 120006	C. sativa	Ukraine			IU600015
TMP23978	TMP23978	CN 120007	C. sativa	Irkutskaya oblast, Russian Federation			IU600017
TMP23979	TMP23979	CN 120008	C. sativa	Omskaya oblast, Russian Federation			IU600018
TMP23980	TMP23980	CN 120009	C. sativa	Novosibirskaya oblast, Russian Federation			IU600019
TMP23982	TMP23982	CN 120010	C. sativa	Respublika Altai, Russian Federation			IU600021
TMP23984	TMP23984	CN 120011	C. sativa	Kazakhstan			IU600024
TMP23986	TMP23986	CN 120013	C. sativa	Primorskii krai, Russian Federation			IU600026
TMP23987	TMP23987	CN 120014	C. sativa	Unknown			IU600027
TMP23988	TMP23988	CN 120015	C. sativa	CHernigivs'ka oblast', Ukraine			IU600028
TMP23989	TMP23989	CN 120016	C. sativa	CHernigivs'ka oblast', Ukraine			IU600029
TMP23990	TMP23990	CN 120017	C. sativa	Respublika Altai, Russian Federation			IU600030
TMP23991	TMP23991	CN 120018	C. sativa	Irkutskaya oblast, Russian Federation			IU600031
TMP23992	TMP23992	CN 120019	C. sativa	Kaliningradskaya oblast, Russian Federation			IU600032
TMP23993	TMP23993	CN 120020	C. sativa	Kirovskaya oblast, Russian Federation			IU600033
TMP23994	TMP23994	CN 120021	C. sativa	Omskaya oblast, Russian Federation			IU600034
TMP23995	TMP23995	CN 120022	C. sativa	Ukraine			IU600049
TMP23998	TMP23998	CN 120024	C. sativa	France			IU600039
TMP24001	TMP24001	CN 120027	C. sativa	Russian Federation			IU600042
TMP24002	TMP24002	CN 120028	C. sativa	Poland			IU600043
TMP24003	TMP24003	CN 120029	C. sativa	Poland			IU600044
TMP24005	TMP24005	CN 120030	C. sativa	Poland			IU600046
Yellowstone			C. sativa
CAM78		CN 113692	C. sativa ssp. pilosa	Former Soviet Union	CAM78

## Sheet: Table S2
Table 2. Percentage of mapped reads for different Camelina species based on Camelina reference genome DH55
Species		C. sativa
Genotype		051-14	11CS0262	17Cs1132	17Cs1133	17Cs1134	BlaineCreek	Calena	CAM105	CAM106	CAM135	CAM138	CAM139	CAM140	CAM141	CAM142	CAM143	CAM144	CAM145	CAM168	CAM189	CAM190	CAM192	CAM194	CAM195	CAM196	CAM197	CAM198	CAM199	CAM200	CAM201	CAM202	CAM203	CAM204	CAM205	CAM206	CAM207	CAM208	CAM209	CAM210	CAM211	CAM212	CAM214	CAM216	CAM218	CAM219	CAM223	CAM224	CAM229
Reads (Paired)		3094543	1282505	1803399	3123889	1497595	1880152	2464780	1984892	1674922	3251803	2123998	2253510	1885237	1746342	1847775	2055784	2681065	2400381	2067764	2040102	2114554	1748394	1690434	1241060	1594945	2395277	1746108	1972437	1894095	187744	2139290	1651418	1887713	2606127	4768471	1859627	2403995	2028542	1961372	2427582	2197396	2775487	3057874	1997974	1056045	1966180	1483261	1201412
Alignment		0.7083	0.9881	0.7769	0.7246	0.9364	0.7065	0.6921	0.742	0.9296	0.7325	0.7216	0.748	0.7508	0.6788	0.7454	0.731	0.7403	0.769	0.7011	0.7107	0.695	0.7242	0.7451	0.7582	0.792	0.7209	0.7672	0.7022	0.7416	0.7524	0.7384	0.778	0.7532	0.7344	0.7089	0.7812	0.8045	0.7387	0.7305	0.7882	0.7518	0.7403	0.7596	0.7182	0.9039	0.8404	0.8444	0.8979
Number of Reads mapped to Chromosomes only		2390995	2145541	1623388	2561035	1826992	1477487	2019525	1568479	2032045	2805058	1645798	2002954	1624352	1314833	1534334	1573049	2188518	2160657	1596663	1637306	1674569	1458300	1481639	1096294	1471915	1918691	1547430	1576513	1562945	1580547	1766112	1472776	1552984	2220145	3819340	1698900	2249810	1675678	1630841	2212772	1863667	2354132	2559893	1559470	890357	1517364	1161397	1046391
Percentage of mapped reads
Subgenome	Sample	051-14	11CS0262	17Cs1132	17Cs1133	17Cs1134	BlaineCreek	Calena	CAM105	CAM106	CAM135	CAM138	CAM139	CAM140	CAM141	CAM142	CAM143	CAM144	CAM145	CAM168	CAM189	CAM190	CAM192	CAM194	CAM195	CAM196	CAM197	CAM198	CAM199	CAM200	CAM201	CAM202	CAM203	CAM204	CAM205	CAM206	CAM207	CAM208	CAM209	CAM210	CAM211	CAM212	CAM214	CAM216	CAM218	CAM219	CAM223	CAM224	CAM229
SGI	Chr14	4.80461	4.89928	4.66383	4.61298	4.76039	4.71598	4.37756	4.67395	4.72204	4.46251	4.79476	4.65033	4.71917	4.80669	4.65792	4.69114	4.76377	4.71995	4.70268	4.51205	4.66162	4.63787	4.75095	4.82024	4.70312	4.65276	4.41118	4.45959	4.593	4.3781	4.51002	4.66819	4.55021	4.58267	4.75166	4.61593	4.70031	4.63991	4.59579	4.59351	4.55017	4.65072	4.66465	4.67543	4.68419	4.65966	4.62271	4.65161
	Chr7	6.54389	4.74911	7.85271	7.77475	8.17245	8.3772	7.12435	8.28102	7.53753	7.37047	8.09808	7.48894	7.5246	7.94839	8.27147	8.22797	7.92308	7.66878	8.44599	7.80257	6.93014	6.71096	7.89545	7.90153	7.97981	8.13263	8.21491	8.26406	8.08704	8.79809	7.51572	8.33446	7.98025	7.63653	7.54989	7.65731	7.81942	7.74373	8.70115	8.18864	7.45552	7.86447	7.9501	8.30013	5.23004	5.40503	5.20632	5.19041
	Chr19	4.73627	4.789	4.73393	4.6824	4.85815	4.78326	4.54156	4.77864	4.78671	4.47342	4.74031	4.74719	4.92467	4.77049	4.86934	4.77747	4.75299	4.83538	4.81517	4.67829	4.59091	4.62319	4.7735	4.73906	4.80925	4.86957	4.80952	4.73209	4.79812	4.88755	4.7698	4.85423	4.807	4.7687	4.85911	4.51104	4.9542	4.83076	4.80059	4.75512	5.08041	4.81502	4.72848	4.84588	4.59748	4.62368	4.61358	4.67588
	Chr4	4.98667	4.4682	5.35103	5.23695	5.50533	5.45142	4.86099	5.49724	5.42301	5.19512	5.46938	5.28739	5.31997	5.36524	5.42763	5.47249	5.28988	5.30667	5.45106	5.32918	4.95405	5.04313	5.2363	5.36416	5.35717	5.43683	5.35081	5.32739	5.34472	5.56674	5.30148	5.5005	5.42131	5.25277	5.29914	5.30184	5.36579	5.3422	5.5732	5.32866	5.21193	5.34295	5.33698	5.45641	4.76607	5.00915	4.74386	4.81321
	Chr8	4.5315	4.29747	4.27156	4.23797	4.25716	4.31151	3.99599	4.38272	4.4627	4.1746	4.37283	4.2635	4.38661	4.35645	4.30102	4.36731	4.36259	4.35368	4.36034	4.19934	4.23631	4.27553	4.29079	4.33515	4.35895	4.32055	4.09673	4.23669	4.3029	4.25827	4.20811	4.34418	4.30024	4.24783	4.38385	4.28053	4.35983	4.33806	4.35689	4.18489	4.26804	4.25601	4.29073	4.32532	4.22864	4.45786	4.27227	4.27278
	Chr11	7.89119	9.65453	7.645	7.69236	7.82986	7.81361	7.23695	7.74202	8.04072	7.4817	7.81937	7.67546	7.94809	7.86982	7.60265	7.82264	7.81643	7.85567	7.82645	7.56163	7.56075	7.65041	7.7367	7.80895	7.73387	7.67852	7.38592	7.48272	7.64429	7.73315	7.62103	7.65941	7.64425	7.65599	7.86094	7.55907	7.67772	7.71712	7.7243	7.46503	7.61842	7.69668	7.75618	7.73673	7.6576	7.96269	7.79768	7.77033
	Subtotal SGI	33.4941	32.8576	34.5181	34.2374	35.3834	35.453	32.1374	35.3556	34.9727	33.1578	35.2947	34.1128	34.8231	35.1171	35.13	35.359	34.9087	34.7401	35.6017	34.0831	32.9338	32.9411	34.6837	34.9691	34.9422	35.0909	34.2691	34.5025	34.7701	35.6219	33.9262	35.361	34.7033	34.1445	34.7046	33.9257	34.8773	34.6118	35.7519	34.5158	34.1845	34.6258	34.7271	35.3399	31.164	32.1181	31.2564	31.3742
SGII	Chr3	4.57157	4.57796	4.44244	4.40556	4.45672	4.41127	4.11681	4.43653	4.56752	4.19478	4.5364	4.25342	4.51306	4.52924	4.44479	4.43953	4.54929	4.5327	4.38978	4.28802	4.4028	4.32133	4.50393	4.43075	4.50243	4.48285	4.18462	4.29632	4.37571	4.4291	4.31434	4.42172	4.42542	4.25729	4.47569	4.33904	4.52243	4.52402	4.44666	4.29199	4.42085	4.42617	4.46128	4.48383	4.21629	4.36164	4.29293	4.32439
	Chr16	4.54254	5.53063	4.41287	4.33957	4.48978	4.44403	4.08344	4.33745	4.54517	4.28583	4.50493	4.3986	4.46517	4.57001	4.36215	4.36553	4.54253	4.45735	4.4454	4.26689	4.2774	4.36591	4.48584	4.39681	4.37389	4.52194	4.15696	4.29137	4.36944	4.33622	4.25692	4.34241	4.42233	4.27765	4.52785	4.32009	4.457	4.46243	4.35898	4.24201	4.34337	4.41233	4.36448	4.4637	4.71114	4.71001	4.3675	4.60325
	Chr1	4.03414	4.08046	3.91662	3.86625	3.83395	3.882	3.61432	3.90072	3.91497	3.71971	3.93195	3.78651	3.9862	3.96294	3.89641	3.86549	3.99129	3.93547	3.85967	3.75067	3.82451	3.8752	3.95994	3.90789	3.88283	3.94456	3.75862	3.68979	3.82189	3.80919	3.79727	3.86698	3.89379	3.85732	3.92607	3.89617	3.8942	3.9319	3.87873	3.77924	3.84994	3.85187	3.83961	3.91056	3.79376	3.95858	3.88463	3.94671
	Chr6	4.40202	4.75712	4.23004	4.2368	4.32908	4.24356	3.99203	4.22894	4.43346	4.1105	4.27379	4.25202	4.27937	4.36801	4.34795	4.31582	4.29798	4.30341	4.30373	4.18077	4.18914	4.24097	4.34586	4.28845	4.3652	4.42135	4.20607	4.23035	4.36202	4.41834	4.28976	4.26501	4.35909	4.27747	4.36819	4.10242	4.32845	4.39655	4.30404	4.27175	5.3678	4.36339	4.27643	4.34186	4.35893	4.49253	4.33375	4.36395
	Chr13	4.08048	3.84966	3.90159	4.04829	3.97845	4.03063	3.80892	4.00018	4.12707	3.79985	4.06976	3.96654	4.07646	4.06044	4.00121	4.03776	4.1269	4.03211	4.00598	3.84913	4.08642	4.03566	4.11423	4.08084	4.05662	4.1177	3.812	3.84761	4.02471	3.94003	3.87065	4.00197	3.9587	3.95443	4.16732	3.87427	4.04772	4.09637	3.9506	3.89534	4.0695	4.07369	4.03447	4.11576	3.88698	3.97611	4.00793	3.99736
	Chr10	4.51988	5.02102	4.47693	4.47632	4.61042	4.38528	4.28784	4.49008	4.49695	4.25011	4.44429	4.48128	4.50555	4.54293	4.51258	4.52141	4.50762	4.50317	4.54711	4.48371	4.28265	4.3873	4.48004	4.51795	4.52118	4.60793	4.58321	4.64823	4.54232	4.6899	4.5654	4.60708	4.66302	4.59411	4.54073	4.34669	4.65364	4.70186	4.48088	4.46354	4.22543	4.53687	4.60629	4.49153	4.29693	4.53392	4.3384	4.43754
	Chr18	2.99014	2.65994	2.92844	2.89672	2.88989	2.96585	2.67291	2.92372	2.9331	2.78668	2.95443	2.78788	2.95527	2.96905	2.93626	2.98325	2.97599	3.00612	2.97045	2.90135	2.90749	2.88295	2.95119	2.99847	2.87883	2.83641	2.76704	2.80074	2.9177	2.91342	2.85826	2.83831	2.88026	2.85044	2.97051	2.87468	2.90718	2.90999	2.93934	2.8509	2.80823	2.84852	2.88989	2.93343	2.75889	2.96198	2.88497	2.86088
	Subtotal SGII	29.1408	30.4768	28.3089	28.2695	28.5883	28.3626	26.5762	28.3176	29.0183	27.1475	28.7156	27.9263	28.7811	29.0026	28.5014	28.5288	28.9916	28.7703	28.5221	27.7205	27.9704	28.1093	28.841	28.6212	28.581	28.9327	27.4685	27.8044	28.4138	28.5362	27.9526	28.3435	28.6026	28.0687	28.9764	27.7534	28.8106	29.0231	28.3592	27.7948	29.0851	28.5128	28.4724	28.7407	28.0229	28.9948	28.1101	28.5341
SGIII	Chr17	5.48491	5.50957	5.22192	5.20938	5.42028	5.28668	4.88204	5.26842	5.4549	5.12895	5.34075	5.0789	5.36965	5.27337	5.23432	5.22654	5.35933	5.32079	5.29304	5.18461	5.26954	5.26682	5.30723	5.28745	5.30493	5.24201	4.95144	5.14731	5.17011	5.16138	5.19186	5.21994	5.18125	5.21642	5.35449	5.25269	5.28605	5.21819	5.29015	5.01706	5.1565	5.21415	5.27999	5.35451	5.15366	5.2292	5.16499	5.17455
	Chr5	4.94664	5.06418	4.9409	4.86788	4.92493	5.01879	4.62386	5.05955	5.00087	4.87641	4.87229	5.0098	5.09643	4.90146	5.12105	5.06036	5.121	5.16408	5.01058	4.9838	5.00427	4.87773	4.75946	4.97458	4.91428	4.89459	4.95144	4.86682	5.19366	4.92855	4.84624	4.97116	4.93759	5.02102	4.87079	4.79145	5.02114	4.98401	5.01741	4.86141	4.9951	5.26521	4.92442	4.98349	5.17118	5.4484	5.1321	5.08529
	Chr15	4.92506	4.62634	4.68871	4.79095	4.8564	4.8481	4.47689	4.91572	4.93877	4.67705	4.78807	4.6696	4.84513	4.78251	4.86244	4.82795	4.93594	4.89416	4.82068	4.69027	4.72181	4.7447	4.82236	4.84906	4.73383	4.7645	4.5235	4.59381	4.75589	4.7271	4.69313	4.71531	4.66573	4.63456	4.9098	4.75272	4.74938	4.7305	4.78293	4.70848	4.58848	4.73975	4.79145	4.7411	4.75158	4.95425	4.69968	4.72309
	Chr9	6.1131	6.29669	5.97713	5.94627	6.05728	6.05501	5.55279	6.0975	6.04947	5.71846	5.98858	5.84587	6.08772	5.99985	6.09007	5.98189	5.92702	6.14295	5.89492	5.90812	5.71896	5.90386	6.03143	6.05914	5.85917	5.95114	5.6862	5.79431	5.8258	5.91618	5.89612	5.90368	6.01024	5.88556	6.10352	5.75902	5.96681	5.91092	6.02094	5.84588	5.87423	5.97503	6.02228	5.91252	5.82149	6.041	5.82402	5.79879
	Chr20	4.98236	4.94523	4.87598	4.84691	5.00292	4.98779	4.59306	5.03966	4.98729	4.78379	5.00304	4.89537	4.95533	5.01067	4.93061	4.98052	4.91575	4.96303	4.91174	4.80521	4.85617	5.01022	4.97989	4.91967	4.79403	4.89229	4.68299	4.72194	4.85788	4.86376	4.88519	4.94087	4.95021	4.83365	5.00233	4.85703	4.8917	4.87934	4.99006	4.82164	4.90528	4.82046	4.81458	4.95072	4.88815	5.15552	5.07664	4.98341
	Chr2	5.88742	5.35315	6.67986	7.00397	4.79904	5.04993	12.6693	5.03265	4.63405	9.82432	5.08288	7.63622	5.07846	5.03881	5.26196	5.15686	4.94344	5.03754	5.10778	7.8529	8.81636	8.26414	5.67345	5.48411	6.07685	5.33082	8.94671	7.88373	6.29798	5.49101	7.79498	5.78146	6.11198	7.40438	5.06978	8.10513	5.5282	5.82188	4.91967	7.82277	6.57296	6.1243	6.20049	5.19612	10.1647	6.87442	9.96472	9.52225
	Chr12	5.02561	4.87047	4.7885	4.82774	4.96751	4.93811	4.48838	4.91329	4.94369	4.68575	4.91409	4.82517	4.96309	4.87362	4.86817	4.87804	4.8972	4.96701	4.83746	4.7715	4.70867	4.88212	4.90146	4.83575	4.79376	4.90105	4.52014	4.68515	4.71482	4.75392	4.81374	4.76311	4.83714	4.79122	5.00835	4.80287	4.86886	4.82026	4.86767	4.61213	4.63785	4.72242	4.76723	4.78098	4.86232	5.18439	4.77132	4.80432
	Subtotal SGIII	37.3651	36.6656	37.173	37.4931	36.0283	36.1844	41.2863	36.3268	36.009	39.6947	35.9897	37.9609	36.3958	35.8803	36.3686	36.1122	36.0997	36.4895	35.8762	38.1964	39.0958	38.9496	36.4753	36.4098	36.4768	35.9764	38.2624	37.6931	36.8161	35.8419	38.1213	36.2955	36.6941	37.7868	36.319	38.3209	36.3121	36.3651	35.8888	37.6894	36.7304	36.8613	36.8004	35.9194	40.8131	38.8872	40.6335	40.0917
[truncated: 145 more columns]

## Sheet: Table S3
Table 3. Distribution of SNPs across subgenomes in Camelina species based on mapping with DH55 reference genome
Subgenome	Chromosome	Camelina species having	All the Camelina
		20 Chromosomes	species
SGI	Chr14	3565	5754
	Chr7	3642	6280
	Chr19	3081	5209
	Chr4	3159	5462
	Chr8	3372	5535
	Chr11	5847	9593
	Subtotal	22666	37833
SGII	Chr3	2539	3642
	Chr16	3214	4333
	Chr1	2373	3406
	Chr6	2319	3477
	Chr13	2236	3337
	Chr10	2492	3614
	Chr18	1829	2740
	Subtotal	17002	24549
SGIII	Chr17	2986	5200
	Chr5	3163	4993
	Chr15	2758	4726
	Chr9	3994	6603
	Chr20	3052	5031
	Chr2	2501	4451
	Chr12	4302	6450
	Subtotal	22756	37454
Scaffolds			2908
Total SNPs		62424	102744
The size of the subgenomes are SG1 32.81%, SG2 with 29.17% and SG3 with 38.02% of total 608.54 Mb. However, the distribution of total SNPs were SG1 with 36.31%, SG2 with 27.24% and SG3 with 36.45%

## Sheet: Table S4
Table 4. Gene diversity and polymorphic information content in Camelina species possessing 20 Chromosomes
Subgenome	Chromosome	SNP	Gene Diversity	Heterozygosity	PIC
SGI	Chr14	54	0.136	0.027	0.119
	Chr7	67	0.151	0.031	0.13
	Chr19	67	0.146	0.03	0.127
	Chr4	51	0.132	0.024	0.114
	Chr8	75	0.107	0.019	0.096
	Chr11	134	0.171	0.036	0.146
	Subtotal	448	0.141	0.028	0.122
SGII	Chr3	51	0.137	0.027	0.117
	Chr16	84	0.135	0.025	0.116
	Chr1	49	0.11	0.019	0.099
	Chr6	41	0.168	0.038	0.145
	Chr13	29	0.18	0.027	0.152
	Chr10	71	0.112	0.024	0.097
	Chr18	45	0.137	0.032	0.121
	Subtotal	370	0.14	0.028	0.121
SGIII	Chr17	55	0.116	0.029	0.103
	Chr5	83	0.176	0.036	0.149
	Chr15	59	0.119	0.024	0.106
	Chr9	118	0.089	0.014	0.08
	Chr20	64	0.135	0.025	0.117
	Chr2	58	0.127	0.024	0.11
	Chr12	121	0.152	0.027	0.13
	Subtotal	558	0.13	0.025	0.113
Unanchored Scaffolds		23
Total		1399	0.137	0.027	0.119
MAF 1%, Missing 10%

## Sheet: Table S5
Table 5 Number of SNPs, gene diversity, heterozygosity and polymorphic information content among 162 domesticated Camelina genotypes.
Subgenome	Chromosome	SNP	Gene Diversity	Heterozygosity	PIC
SGI	Chr14	38	0.179	0.041	0.154
	Chr7	49	0.206	0.05	0.174
	Chr19	52	0.179	0.04	0.154
	Chr4	31	0.198	0.041	0.165
	Chr8	41	0.121	0.031	0.108
	Chr11	114	0.188	0.043	0.159
	Subtotal	325	0.179	0.041	0.153
SGII	Chr3	33	0.179	0.042	0.151
	Chr16	48	0.19	0.042	0.162
	Chr1	27	0.132	0.028	0.12
	Chr6	28	0.183	0.046	0.158
	Chr13	19	0.237	0.041	0.197
	Chr10	34	0.172	0.044	0.144
	Chr18	30	0.169	0.05	0.148
	Subtotal	219	0.18	0.042	0.154
SGIII	Chr17	33	0.164	0.048	0.143
	Chr5	60	0.197	0.046	0.166
	Chr15	36	0.16	0.038	0.141
	Chr9	43	0.159	0.034	0.135
	Chr20	44	0.166	0.035	0.141
	Chr2	37	0.201	0.042	0.17
	Chr12	69	0.232	0.048	0.194
	Subtotal	322	0.183	0.042	0.156
Total SNPs		866	0.181	0.042	0.154
MAF 1%, Missing 10%

## Sheet: Table S6
Table 6. Distribution of genotypes based on STRUCTURE analysis
Genotype	CG1	CG2	CG3
TMP26169	0	0	1
TMP26172	0	0	1
TMP26171	0	0	0.999
TMP24026	0.015	0.006	0.979
TMP26170	0.08	0.008	0.912
TMP26173	0.008	0.122	0.87
TMP26168	0.188	0.225	0.586
CAM176	0.68	0.019	0.302
Joelle	0.735	0.041	0.224
CN113692	0.784	0.02	0.196
CN113660	0.511	0.336	0.153
CN113691	0.745	0.138	0.117
CN113662	0.895	0.001	0.104
Cam276	0.446	0.521	0.033
TMP23984	0.968	0.002	0.03
17Cs1134	0.764	0.216	0.02
Cam223	0.23	0.754	0.016
CN113669	0.571	0.412	0.016
CAM279	0.489	0.496	0.015
Hoga	0.544	0.442	0.014
17Cs1132	0.448	0.539	0.013
17Cs1133	0.538	0.45	0.011
TMP23976	0.303	0.686	0.01
TMP23990	0.713	0.279	0.008
TMP23993	0.666	0.328	0.006
051-14	0.728	0.267	0.005
TMP23980	0.823	0.174	0.003
TMP23987	0.852	0.145	0.003
CAM44	0.534	0.464	0.002
CN113683	0.001	0.999	0.001
CAM138	0.002	0.997	0.001
CN101990	0.006	0.992	0.001
CAM72	0.009	0.99	0.001
CAM201	0.017	0.982	0.001
CN113682	0.024	0.976	0.001
CAM142	0.025	0.975	0.001
CAM106	0.032	0.967	0.001
CAM192	0.198	0.802	0.001
Glacier	0.327	0.672	0.001
TMP23971	0.423	0.577	0.001
Suneson	0.474	0.526	0.001
CAM248	0.52	0.479	0.001
CN111331	0.681	0.319	0.001
Yellowstone	0.781	0.218	0.001
TMP23969	0.817	0.183	0.001
TMP23966	0.832	0.167	0.001
11CS0262	0.85	0.149	0.001
TMP23982	0.878	0.121	0.001
TMP23975	0.897	0.103	0.001
CN113721	0.899	0.1	0.001
TMP23995	0.976	0.023	0.001
CAM140	0.001	0.999	0
CAM141	0.001	0.999	0
CAM143	0.001	0.999	0
CAM144	0.001	0.999	0
CAM145	0.001	0.999	0
CAM210	0.001	0.999	0
CAM240	0.001	0.999	0
CN101985	0.001	0.999	0
CN113742	0.001	0.999	0
CN113760	0.001	0.999	0
Cam224	0.001	0.999	0
CAM105	0.002	0.998	0
CAM59	0.002	0.998	0
CN101986	0.002	0.998	0
TMP24005	0.001	0.998	0
CAM168	0.003	0.997	0
CAM206	0.003	0.997	0
CN113757	0.003	0.997	0
Cam229	0.003	0.997	0
CAM58	0.002	0.997	0
CAM70	0.002	0.997	0
CAM236	0.004	0.996	0
Cam275	0.004	0.996	0
CAM247	0.005	0.995	0
CAM194	0.004	0.995	0
CAM139	0.006	0.994	0
CN113695	0.005	0.994	0
CAM249	0.007	0.993	0
Omega	0.007	0.993	0
CAM135	0.007	0.992	0
CAM195	0.009	0.991	0
CN113724	0.009	0.991	0
BlaineCreek	0.001	0.99	0
Cam260	0.05	0.949	0
CAM258	0.058	0.942	0
CAM211	0.074	0.926	0
CN113694	0.078	0.922	0
CAM190	0.086	0.914	0
CN113656	0.146	0.854	0
CN113754	0.147	0.853	0
CN114262	0.148	0.851	0
Creston	0.156	0.844	0
CAM246	0.163	0.836	0
CN114270	0.168	0.832	0
CAM189	0.193	0.807	0
CAM205	0.195	0.805	0
TMP23974	0.215	0.785	0
CN113746	0.215	0.784	0
PI650132	0.256	0.744	0
CN113736	0.299	0.701	0
CAM214	0.339	0.661	0
CAM271	0.361	0.639	0
TMP24002	0.373	0.627	0
CAM196	0.379	0.621	0
CN113726	0.405	0.595	0
TMP23970	0.406	0.593	0
CAM209	0.406	0.593	0
TMP24003	0.417	0.583	0
CN113731	0.422	0.578	0
CN113698	0.433	0.567	0
CAM257	0.436	0.563	0
TMP23963	0.462	0.538	0
CAM198	0.476	0.524	0
CN113706	0.479	0.521	0
CAM200	0.491	0.508	0
TMP23962	0.499	0.501	0
Robinson	0.524	0.476	0
TMP24001	0.562	0.438	0
CN113702	0.561	0.438	0
CAM256	0.568	0.432	0
Calena	0.59	0.41	0
Orovata	0.603	0.397	0
TMP23994	0.625	0.375	0
CN113685	0.628	0.372	0
CAM218	0.644	0.356	0
CN113699	0.653	0.347	0
CAM208	0.661	0.339	0
CN113723	0.663	0.337	0
Jasper	0.697	0.303	0
CAM197	0.706	0.294	0
TMP23973	0.731	0.269	0
TMP23978	0.733	0.267	0
CN113717	0.743	0.257	0
Cam219	0.774	0.226	0
CAM207	0.795	0.205	0
CAM216	0.796	0.204	0
CAM235	0.814	0.185	0
CAM252	0.849	0.15	0
CAM245	0.858	0.142	0
TMP23991	0.864	0.136	0
CAM250	0.863	0.136	0
TMP23979	0.865	0.135	0
CAM199	0.865	0.134	0
Cam262	0.871	0.128	0
CN30478	0.895	0.104	0
CN30475	0.932	0.068	0
CAM202	0.94	0.059	0
TMP23967	0.942	0.057	0
MIDAS	0.958	0.041	0
CN113672	0.961	0.039	0
TMP23988	0.963	0.037	0
TMP23965	0.965	0.035	0
CN113716	0.983	0.017	0
TMP23964	0.988	0.012	0
TMP23986	0.99	0.009	0
CAM203	0.993	0.007	0
CAM204	0.992	0.007	0
TMP23992	0.997	0.003	0
TMP23998	0.998	0.002	0
TMP23989	0.997	0.002	0
CAM212	0.999	0.001	0
CAM234	0.999	0.001	0
CAM239	0.999	0.001	0
CAM241	0.999	0.001	0
CAM278	0.999	0.001	0
CAM73	0.999	0.001	0
CN113704	0.999	0.001	0
CN113750	0.999	0.001	0

## Sheet: Table S7
Table 7. Pairwise Fst analysis among four subpopulations defined by STRUCTURE analysis with 124 accessions
A. First subgenome
	CG1	CG2	CG3
CG1	0
CG2	0.0358933	0
CG3	0.239696	0.268413	0
B. Second subgenome
	CG1	CG2	CG3
CG1	0
CG2	0.0399141	0
CG3	0.260492	0.290356	0
C. Third subgenome
	CG1	CG2	CG3
CG1	0
CG2	0.0462478	0
CG3	0.281445	0.301485	0
D. Among 169 accessions
	CG1	CG2	CG3
CG1	0
CG2	0.0404971	0
CG3	0.262689	0.288168	0

## Sheet: Table S8
Table 8. Distribution of minor alleles across subgenomes in Camelina species based on mapping with DH55 reference genome (Csa: C. sativa, Cm20: C. microcarpa "Type 1" and Cm19: C. microcarpa "Type 2")
Subgenome	Chromosomes	Csa	Cm20	Cm19	Csa-Cm20	Csa-Cm19	Cm20-Cm19	Csa-Cm20-Cm19
I	Chr14	26	21	89	7	3	7	3
	Chr7	17	17	70	10	15	11	0
	Chr19	23	18	92	8	12	5	2
	Chr4	14	17	97	6	2	9	2
	Chr8	20	27	102	6	9	7	2
	Chr11	48	28	194	36	2	27	8
	Subtotal	148	128	644	73	43	66	17
II	Chr3	13	17	46	9	2	6	1
	Chr16	17	22	59	9	1	7	4
	Chr1	16	17	47	8	1	7	2
	Chr6	7	2	46	5	1	1	3
	Chr13	7	6	63	3	2	2	0
	Chr10	18	31	56	7	3	13	3
	Chr18	15	12	62	1	1	4	0
	Subtotal	93	107	379	42	11	40	13
III	Chr17	19	15	30	4	0	2	1
	Chr5	17	18	3	10	0	1	0
	Chr15	9	23	12	7	0	0	0
	Chr9	21	56	11	20	0	3	1
	Chr20	19	11	6	10	0	0	0
	Chr2	9	18	7	9	1	2	0
	Chr12	15	49	15	10	3	2	0
	Subtotal	109	190	84	70	4	10	2
unanchored-Scaffolds		5	8	4	8	0	1	1
Total		355	433	1111	193	58	117	33

## Sheet: Table S8a
Table 8a. Minor alleles not present in domesticated Camelina sativa
Chr	Pos	Csativa	Arabidopsis
Chr1	441676	Csa01g001960	AT3G02410
Chr1	503782	Csa01g002120	AT3G02540
Chr1	1964096	Csa01g006570	AT3G05680
Chr1	2487876	Csa01g007670	AT3G06640
Chr1	2699961	Csa01g008100	AT3G07100
Chr1	2788500	Csa01g008310	AT3G07290
Chr1	4261533	Csa01g011690	AT3G10760
Chr1	4730948	Csa01g012720	AT3G11630
Chr1	7660056	Csa01g020060	AT3G17430
Chr1	7716282	Csa01g020170	AT3G17350
Chr1	9277531	Csa01g023060	AT3G20000
Chr1	9755734	Csa01g023940	AT3G20860
Chr1	10857710	Csa01g025750	AT3G22500
Chr1	13331648	Csa01g030620	AT3G24550
Chr1	13922065	Csa01g031350	AT3G25430
Chr1	14751767	Csa01g032350	AT2G17410
Chr10	1130976	Csa10g003350	AT4G37750
Chr10	2243528	Csa10g006540	AT4G35610
Chr10	3007991	Csa10g008150	AT4G34090
Chr10	4552902	Csa10g011380	AT4G31120
Chr10	7057473	Csa10g016900	AT4G26010
Chr10	7805038	Csa10g018480	AT4G24550
Chr10	7881812	Csa10g018580	AT4G24430
Chr10	7930528	Csa10g018710	NA
Chr10	8147352	Csa10g019140	AT4G23910
Chr10	9113236	Csa10g020870	AT4G22310
Chr10	10248583	Csa10g023020	AT4G20160
Chr10	10860465	Csa10g024950	AT4G19200
Chr10	12539916	Csa10g028740	AT4G16765
Chr10	12874633	Csa10g029380	NA
Chr10	18509065	Csa10g040130	NA
Chr10	20026375	Csa10g042570	AT3G01720
Chr10	21446410	Csa10g044610	AT5G38510
Chr10	21854261	Csa10g044990	AT5G38840
Chr10	24131967	Csa10g049480	AT5G40940
Chr10	24414116	Csa10g049900	AT5G41360
Chr10	25227377	Csa10g051810	AT5G42080
Chr11	618507	Csa11g002310	AT4G39280
Chr11	1028074	Csa11g003160	NA
Chr11	2206203	Csa11g005490	AT4G36195
Chr11	2528555	Csa11g006170	AT4G35620
Chr11	2977647	Csa11g007110	NA
Chr11	3217309	Csa11g007590	NA
Chr11	3989379	Csa11g010110	AT4G33050
Chr11	4023300	Csa11g010150	AT4G33010
Chr11	4485545	Csa11g010970	AT4G32340
Chr11	4877624	Csa11g011740	AT4G31680
Chr11	6551311	Csa11g014730	AT4G28790
Chr11	8082535	Csa11g018170	AT4G26220
Chr11	8213020	Csa11g018380	AT4G26010
Chr11	8495322	Csa11g018970	AT4G25550
Chr11	9049480	Csa11g020040	AT4G24650
Chr11	9775912	Csa11g021240	AT4G23660
Chr11	10282008	Csa11g022910	AT4G23160
Chr11	10575176	Csa11g023420	AT4G22758
Chr11	11498291	Csa11g024950	AT4G21490
Chr11	11924254	Csa11g025610	AT4G20900
Chr11	11942138	Csa11g025660	AT4G20850
Chr11	14634194	Csa11g031310	AT4G17410
Chr11	15303450	Csa11g033230	AT4G16566
Chr11	17235444	Csa11g035480	NA
Chr11	18927462	Csa11g040020	AT4G14240
Chr11	19101438	Csa11g041230	AT4G13750
Chr11	28137944	Csa11g059430	AT5G40910
Chr11	28502574	Csa11g059920	AT5G41370
Chr11	29207372	Csa11g062850	AT5G42080
Chr11	31010619	Csa11g065840	AT5G46180
Chr11	33637033	Csa11g070750	AT5G43990
Chr11	33776035	Csa11g070900	AT5G43910
Chr11	37706358	Csa11g078540	AT5G49270
Chr11	38496344	Csa11g081220	AT5G49900
Chr11	39570623	Csa11g082550	NA
Chr11	40466658	Csa11g083830	AT5G52160
Chr11	41051832	Csa11g084720	AT5G52910
Chr11	42411526	Csa11g087750	AT5G54730
Chr11	42639725	Csa11g088160	AT5G55040
Chr11	42894337	Csa11g088640	AT5G55460
Chr11	45053826	Csa11g092760	AT5G58980
Chr11	45075438	Csa11g092820	AT5G59010
Chr11	46033268	Csa11g094700	AT5G60840
Chr11	46047491	Csa11g094730	AT5G60870
Chr11	46708771	Csa11g098990	NA
Chr11	47464254	Csa11g100400	AT5G63460
Chr11	47499759	Csa11g100500	AT5G63540
Chr11	47612233	Csa11g100750	NA
Chr11	49094140	Csa11g103790	AT5G67150
Chr11	49453761	Csa11g104510	NA
Chr11	49515626	Csa11g104640	AT5G66320
Chr12	3697045	Csa12g011810	AT4G33050
Chr12	9964305	Csa12g032280	NA
Chr12	10017785	Csa12g033300	NA
Chr12	13039750	Csa12g039280	AT4G20060
Chr12	16733363	Csa12g051500	AT4G16550
Chr12	16886418	Csa12g051830	AT4G16400
Chr12	26260627	Csa12g075060	NA
Chr12	29313024	Csa12g081500	NA
Chr13	532727	Csa13g002160	AT5G02310
Chr13	2798551	Csa13g009100	AT5G07080
Chr13	3209391	Csa13g009950	AT5G07970
Chr13	4971766	Csa13g014770	AT5G11910
Chr13	5533064	Csa13g015890	AT5G13290
Chr13	5776654	Csa13g016250	AT5G13590
Chr13	6745994	Csa13g018580	AT5G15780
Chr13	6884612	Csa13g018920	AT5G16110
Chr13	9036742	Csa13g023290	AT5G20340
Chr13	10664691	Csa13g027920	AT5G23340
Chr13	12942597	Csa13g033670	AT5G25780
Chr13	13122036	Csa13g033860	NA
Chr13	18821303	Csa13g048290	AT4G11130
Chr13	19455806	Csa13g048840	AT4G11670
Chr13	19667945	Csa13g049090	AT4G11900
Chr13	21340691	Csa13g053030	NA
Chr13	21346727	Csa13g053040	AT4G05090
Chr13	21456667	Csa13g053230	AT4G05310
Chr13	22029732	Csa13g054030	AT4G02940
Chr13	22081233	Csa13g054200	AT4G03080
Chr13	22176691	Csa13g054410	AT4G02720
Chr14	398634	Csa14g001940	AT1G01220
Chr14	1100278	Csa14g004420	NA
Chr14	2139223	Csa14g006580	AT1G05300
Chr14	2249083	Csa14g006790	AT1G05500
Chr14	2574813	Csa14g007560	AT1G06170
Chr14	2581808	Csa14g007570	NA
Chr14	3384544	Csa14g009500	AT1G08060
Chr14	4153289	Csa14g011010	AT1G09600
Chr14	4859330	Csa14g013470	AT1G10820
Chr14	5103816	Csa14g013980	NA
Chr14	5233135	Csa14g014210	AT1G11470
Chr14	6063935	Csa14g015800	NA
Chr14	6301297	Csa14g016190	AT1G13210
Chr14	6876387	Csa14g017520	AT1G14480
Chr14	7462552	Csa14g018810	AT1G15740
Chr14	8174352	Csa14g021470	AT1G17250
Chr14	8495082	Csa14g022110	AT1G17770
Chr14	9409318	Csa14g024800	AT1G19490
Chr14	9554410	Csa14g025100	AT1G19835
Chr14	9806995	Csa14g025610	AT1G20350
Chr14	9922141	Csa14g025780	AT1G20570
Chr14	12748374	Csa14g032540	NA
Chr14	13029660	Csa14g034030	NA
Chr14	13166532	Csa14g034250	NA
Chr14	13407587	Csa14g034650	AT1G24460
Chr14	14063907	Csa14g035690	AT1G28100
Chr14	15785759	Csa14g038070	AT1G30420
Chr14	17328646	Csa14g041860	AT1G31880
Chr14	17657119	Csa14g042190	NA
Chr14	21802899	Csa14g048930	NA
Chr14	24310206	Csa14g053150	NA
Chr14	24740211	Csa14g054560	AT1G48480
Chr14	27052148	Csa14g058820	AT1G50500
Chr14	27065717	Csa14g058860	AT1G50570
Chr14	27919556	Csa14g059850	AT1G51600
Chr14	31181748	Csa14g067760	AT1G55880
Chr15	1386139	Csa15g005350	AT3G04490
Chr15	3013024	Csa15g009030	NA
Chr15	5151426	Csa15g015820	NA
Chr15	13142521	Csa15g033610	NA
Chr15	20287477	Csa15g062010	NA
Chr15	21751036	Csa15g064470	AT2G14050
Chr15	26707931	Csa15g076280	AT2G17845
Chr16	73609	Csa16g001130	AT3G63400
Chr16	394658	Csa16g001770	AT3G62860
Chr16	786103	Csa16g002570	AT3G62080
Chr16	2427949	Csa16g006550	AT3G59240
Chr16	3307513	Csa16g008240	NA
Chr16	3813762	Csa16g009130	NA
Chr16	4939981	Csa16g013120	AT2G30695
Chr16	5460595	Csa16g014800	NA
Chr16	9137276	Csa16g018540	NA
Chr16	10454228	Csa16g021490	AT1G65040
Chr16	14361130	Csa16g027270	AT1G67430
Chr16	15026398	Csa16g028120	AT1G68000
Chr16	16237135	Csa16g030640	NA
Chr16	16630740	Csa16g031260	AT1G69730
Chr16	19212445	Csa16g036620	AT1G73805
Chr16	19547870	Csa16g038310	AT1G74390
Chr16	20015261	Csa16g039200	AT1G75310
Chr16	20659945	Csa16g040440	AT1G76310
Chr16	21255026	Csa16g041480	AT1G77300
Chr16	22168265	Csa16g043320	AT2G21510
Chr16	23118275	Csa16g045090	AT2G23350
Chr16	24185266	Csa16g046990	AT2G25355
Chr16	24853905	Csa16g048240	AT1G78690
Chr16	24962969	Csa16g048520	AT1G78955
Chr16	26654327	Csa16g051860	AT2G27680
Chr16	27838326	Csa16g055110	AT1G62370
Chr16	28707217	Csa16g056680	AT1G63980
Chr17	203154	Csa17g001460	NA
Chr17	1889509	Csa17g008170	AT1G04920
Chr17	2854831	Csa17g010550	AT1G07150
Chr17	7913027	Csa17g022900	AT1G17210
Chr17	12802089	Csa17g034860	AT1G26090
Chr17	14029555	Csa17g037930	AT1G28120
Chr18	5149435	Csa18g010180	AT5G43680
Chr18	10579798	Csa18g021100	AT5G50370
Chr18	12797830	Csa18g024450	AT5G53430
Chr18	14990750	Csa18g029520	AT5G56610
Chr18	15367063	Csa18g030060	NA
Chr18	15576254	Csa18g030460	NA
Chr18	15579438	Csa18g030470	NA
Chr18	18345964	Csa18g036200	NA
Chr18	18458248	Csa18g036470	AT5G63000
Chr18	18688922	Csa18g036990	AT5G63460
Chr18	18695894	Csa18g037020	AT5G63490
Chr19	1548566	Csa19g006580	AT3G04450
Chr19	2014471	Csa19g007710	AT3G05380
Chr19	2312188	Csa19g008370	AT3G05840
Chr19	2544365	Csa19g009870	AT3G06210
Chr19	2857182	Csa19g010380	AT3G06660
Chr19	3210078	Csa19g011120	AT3G07400
Chr19	4646253	Csa19g014440	AT3G10760
Chr19	4648362	Csa19g014450	AT3G10770
Chr19	7923185	Csa19g023170	AT3G16290
Chr19	7984027	Csa19g023250	AT3G16370
Chr19	8542268	Csa19g024310	NA
Chr19	8648768	Csa19g024440	AT3G17360
Chr19	9121551	Csa19g025330	AT3G18080
Chr19	9551835	Csa19g026190	AT3G18773
Chr19	15226893	Csa19g036840	AT3G24900
Chr19	21116024	Csa19g048860	NA
Chr19	21117715	Csa19g048870	AT2G20000
Chr19	21930024	Csa19g050640	AT2G15900
Chr19	23724288	Csa19g054030	AT2G17230
Chr19	23915800	Csa19g054220	AT2G17390
Chr19	24601449	Csa19g054870	AT2G17900
Chr19	25019143	Csa19g056180	AT2G19110
Chr2	287709	Csa02g001490	AT4G00450
Chr2	1680339	Csa02g005750	AT4G02480
Chr2	3487826	Csa02g011470	NA
Chr2	4579270	Csa02g014360	AT4G12510
Chr2	14826094	Csa02g038020	AT5G50400
Chr2	23066948	Csa02g060050	AT5G56760
Chr2	25728074	Csa02g068450	AT5G61480
Chr2	29030265	Csa02g076710	AT5G66100
Chr20	7377679	Csa20g023720	AT5G16100
Chr3	1295520	Csa03g004920	AT1G03790
Chr3	1551410	Csa03g005430	AT1G04200
Chr3	2063279	Csa03g006580	AT1G05200
Chr3	2949157	Csa03g010560	AT1G07150
Chr3	4092343	Csa03g013100	AT1G09760
Chr3	4815750	Csa03g014550	AT1G10910
Chr3	5599691	Csa03g016210	AT1G12460
Chr3	5752781	Csa03g016530	AT1G12740
Chr3	6550509	Csa03g018170	AT1G14440
Chr3	8003562	Csa03g021560	AT1G17745
Chr3	8008520	Csa03g021570	AT1G17750
Chr3	8038969	Csa03g021640	AT1G17820
Chr3	8328772	Csa03g022280	AT1G18450
Chr3	8638045	Csa03g022920	AT1G19086
Chr3	10506698	Csa03g026670	AT1G22830
Chr3	12304862	Csa03g030040	AT1G24735
Chr3	12513949	Csa03g030410	AT1G24310
Chr3	13266630	Csa03g031720	AT1G28380
Chr3	14603690	Csa03g033850	AT1G30600
Chr3	16556951	Csa03g037260	AT1G32960
Chr3	17172245	Csa03g038120	AT1G34000
Chr3	19847958	Csa03g046950	AT1G44446
Chr3	26427127	Csa03g059860	NA
Chr4	314616	Csa04g002170	AT2G01220
Chr4	372447	Csa04g002360	AT2G01320
Chr4	2431548	Csa04g008250	AT2G02760
Chr4	2595971	Csa04g008400	AT2G02950
Chr4	3954188	Csa04g009830	AT3G25610
Chr4	4287907	Csa04g011110	NA
Chr4	4642818	Csa04g011370	NA
Chr4	5232228	Csa04g012000	AT3G26490
Chr4	9421611	Csa04g018560	NA
Chr4	11310483	Csa04g023900	AT3G44200
Chr4	11757934	Csa04g024260	AT3G44600
Chr4	11936485	Csa04g024430	AT3G44730
Chr4	14498988	Csa04g030330	AT3G47450
Chr4	14909852	Csa04g030900	NA
Chr4	15748256	Csa04g033990	AT3G48770
Chr4	16167123	Csa04g034620	AT3G49170
Chr4	17899562	Csa04g037120	NA
Chr4	18230630	Csa04g037690	AT3G51870
Chr4	18781506	Csa04g038810	AT3G52890
Chr4	18960430	Csa04g039140	AT3G53200
Chr4	21171435	Csa04g043290	AT3G56900
Chr4	21664422	Csa04g044240	AT3G57740
Chr4	22466576	Csa04g046850	AT2G34590
Chr4	22967170	Csa04g047820	AT2G35500
Chr4	24001259	Csa04g050710	AT2G37150
Chr4	24102211	Csa04g050950	AT2G37390
Chr4	26133116	Csa04g054920	NA
Chr5	17204843	Csa05g044810	AT1G60730
Chr5	18222818	Csa05g049670	NA
Chr5	23926227	Csa05g067360	AT1G65200
Chr6	5075172	Csa06g009010	AT3G27870
Chr6	13355260	Csa06g023540	AT3G49530
Chr6	14505737	Csa06g025300	AT3G51150
Chr6	14912591	Csa06g026070	AT3G51870
Chr6	15351875	Csa06g027150	AT3G52750
Chr6	17093460	Csa06g030580	AT3G55920
Chr6	17551573	Csa06g031620	AT3G56900
Chr6	19148208	Csa06g037840	AT2G35330
Chr6	20211219	Csa06g039830	AT2G37150
Chr6	20884772	Csa06g041300	AT2G38460
Chr6	24361182	Csa06g050410	AT2G44100
Chr6	25519816	Csa06g052810	AT2G46320
Chr7	810543	Csa07g002640	AT3G61960
Chr7	1696459	Csa07g004330	AT3G60590
Chr7	2729141	Csa07g007160	AT2G34210
Chr7	2743294	Csa07g007190	AT2G34190
Chr7	3803956	Csa07g009890	NA
Chr7	7646179	Csa07g015950	AT2G28600
Chr7	9510161	Csa07g017550	AT1G59550
Chr7	14455506	Csa07g029540	NA
Chr7	21011800	Csa07g037900	AT1G71010
Chr7	25307374	Csa07g049920	NA
Chr7	26140951	Csa07g051420	AT2G21230
Chr7	26278221	Csa07g051670	AT2G21510
Chr7	27040891	Csa07g052990	AT2G22910
Chr7	28296087	Csa07g055060	NA
Chr7	28501879	Csa07g056420	AT2G25355
Chr7	29007174	Csa07g057210	AT2G26260
Chr7	30206739	Csa07g059670	AT1G80170
Chr8	34093	Csa08g001050	AT4G00040
Chr8	357641	Csa08g001720	NA
Chr8	379787	Csa08g001750	AT4G00620
Chr8	1010455	Csa08g002860	AT5G11710
Chr8	1030449	Csa08g002910	NA
Chr8	1677489	Csa08g005140	AT5G13260
Chr8	5097864	Csa08g011750	AT5G19140
Chr8	5837016	Csa08g014120	AT5G20280
Chr8	6297349	Csa08g014790	AT5G20960
Chr8	6306629	Csa08g014820	AT5G20990
Chr8	6373720	Csa08g014940	AT5G21120
Chr8	6697417	Csa08g015490	AT5G22320
Chr8	6804651	Csa08g015690	AT5G22470
Chr8	7133617	Csa08g016050	AT5G22780
Chr8	7708254	Csa08g017750	AT5G23390
Chr8	10435359	Csa08g023360	AT5G25630
Chr8	11384627	Csa08g024420	AT5G26680
Chr8	12353413	Csa08g028090	AT5G27610
Chr8	15731452	Csa08g037430	NA
Chr8	15997325	Csa08g037550	NA
Chr8	20328850	Csa08g048860	AT4G04860
Chr8	21526298	Csa08g050620	NA
Chr8	21750980	Csa08g051980	NA
Chr8	24171971	Csa08g056420	NA
Chr8	24283539	Csa08g056680	AT5G07710
Chr8	24341762	Csa08g056790	AT5G07600
Chr8	26006838	Csa08g060250	AT5G04240
Chr8	26034507	Csa08g060300	NA
Chr8	26466169	Csa08g061110	AT5G03450
Chr9	9399736	Csa09g023130	NA
Chr9	15455596	Csa09g041210	AT3G46160
Chr9	16145438	Csa09g042830	AT3G46670
Chr9	19653219	Csa09g051560	NA
Chr9	23762154	Csa09g062100	AT3G53690
Chr9	24656715	Csa09g064660	AT3G54870
Chr9	25636638	Csa09g068030	AT3G55920
Scaffold00507	105092	Csa00507s110	NA
Scaffold00574	50605	Csa00574s010	NA

## Sheet: Table S8b
Table 8b. List of flowering responses genes with minor alleles in the wild relatives of Camelina sativa
Camelina Gene	Chromosome	Position	Variants	Ortholog in Arabidopsis thaliana	Name of gene	Protein	Reference
Csa16g041480	Chr16	21255026	A/T	AT1G77300	EFS (EARLY FLOWERING IN SHORT DAYS) also called SDG8 (SET DOMAIN GROUP 8)	Intron	Xu et al., 2008
Csa04g008250	Chr4	2431548	C/T	AT2G02760	UBC2 (UBIQUITIN CONJUGATING ENZYME 2)	CTT to CCT (Leu to Pro)	Xu et al., 2009
Csa08g060250	Chr8	26004013	G/A	AT5G04240	ELF6 (EARLY FLOWERING 6)	Antisense (CCC to CTC) (Pro to Leu)	Noh et al., 2004; Jeong et al., 2009
Xu L, Ménard R, Berr A, Fuchs J, Cognat V, Meyer D, Shen WH. 2009. The E2 ubiquitin‐conjugating enzymes, AtUBC1 and AtUBC2, play redundant roles and are involved in activation of FLC expression and repression of flowering in Arabidopsis thaliana. The Plant Journal 57(2): 279-288.
Xu L, Zhao Z, Dong A, Soubigou-Taconnat L, Renou J-P, Steinmetz A, Shen W-H. 2008. Di-and tri-but not monomethylation on histone H3 lysine 36 marks active transcription of genes involved in flowering time regulation and other processes in Arabidopsis thaliana. Molecular and cellular biology 28(4): 1348-1360.
Noh B, Lee S-H, Kim H-J, Yi G, Shin E-A, Lee M, Jung K-J, Doyle MR, Amasino RM, Noh Y-S. 2004. Divergent roles of a pair of homologous Jumonji/Zinc-Finger–class transcription factor proteins in the regulation of Arabidopsis flowering time. The Plant Cell 16(10): 2601-2613.
Jeong J-H, Song H-R, Ko J-H, Jeong Y-M, Kwon YE, Seol JH, Amasino RM, Noh B, Noh Y-S. 2009. Repression of FLOWERING LOCUS T chromatin by functionally redundant histone H3 lysine 4 demethylases in Arabidopsis. PloS one 4(11): e8033.

[truncated: 2 more sheets: Table S9, Table S10]
